Revised manuscript

1 **The validity and consistency of continuous joystick response in perceptual**  
2 **decision-making**

3 Maciej J. Szul, Aline Bompas, Petroc Sumner, Jiaxiang Zhang

4 *Cardiff University Brain Research Imaging Centre, School of Psychology, Cardiff University,*  
5 *Cardiff CF24 4HQ, United Kingdom*

6

7 Abbreviated title: Validity of joystick response in perceptual decision-making

8 Text pages: 42

9 Figures: 4

10 Table: 1

11 Supplementary Figure: 1

12

13 *Correspondence should be addressed to:*

14 Maciej Szul (SzulMJ@cardiff.ac.uk)

15 *Cardiff University Brain Research Imaging Centre, School of Psychology, Cardiff University,*  
16 *Cardiff CF24 4HQ, United Kingdom*

17

18 **Acknowledgements**

19 MJS was supported by a PhD studentship from Cardiff University School of Psychology. JZ was  
20 supported by a European Research Council Starting grant (716321). The authors declare no  
21 competing financial interests. We want to thank Simon Rushton for the helpful comments.

Revised manuscript

22 **Abstract**

23 A computer joystick is an efficient and cost-effective response device for recording continuous  
24 movements in psychological experiments. Movement trajectories and other measures from  
25 continuous responses have expanded the insights gained from discrete responses (e.g. button  
26 presses) by providing unique information on how cognitive processes unfold over time. However,  
27 few studies have evaluated the validity of joystick responses with reference to conventional key  
28 presses, and response modality can affect cognitive processes. Here, we systematically compared  
29 human participants' behavioural performance of perceptual decision-making when they responded  
30 with either joystick movements or key presses in a four-alternative motion discrimination task. We  
31 found evidence that the response modality did not affect raw behavioural measures including  
32 decision accuracy and mean reaction time (RT) at the group level. Furthermore, to compare the  
33 underlying decision processes between the two response modalities, we fitted a drift-diffusion  
34 model of decision-making to individual participant's behavioural data. Bayesian analyses of the  
35 model parameters showed no evidence that switching from key presses to continuous joystick  
36 movements modulated the decision-making process. These results supported continuous joystick  
37 actions as a valid apparatus for continuous movements, although we highlighted the need for  
38 caution when conducting experiments with continuous movement responses.

39

40 **Keywords**

41 Joystick trajectory, decision-making, computational modelling, behavioural experiments, drift-  
42 diffusion model

Revised manuscript

43 **Introduction**

44 Discrete key presses on a keyboard or button box have been the long-standing response modality  
45 in computer-based experiments in psychology, from which on/off responses and response time  
46 (RT) are commonly measured. Developments in computers and electronics technology have  
47 improved the accessibility of other devices that are capable of recording continuous responses,  
48 e.g., joystick, computer mouse, motion sensor and robotic arm (Koop & Johnson, 2011; O’Hora,  
49 Dale, Piiroinen, & Connolly, 2013). In addition to the standard behavioural measures available  
50 from key presses, continuous responses enable further inferences from movement trajectories.  
51 However, to utilize the full capacity of continuous response recording, we need to ensure that  
52 experimental results from these devices are consistent with, or generalizable to, the findings from  
53 conventional response modalities such as key presses. The current study addressed this issue by  
54 comparing the behavioural performance between joystick movements and key presses in a  
55 perceptual decision-making task. Using computational modelling of behavioural data, we further  
56 compared the decision-making processes from the two response modalities.

57

58 *Continuous and discrete responses in experimental psychology*

59 Continuous responses can offer theoretical and practical advantages in experiments. First, although  
60 a discrete response is consistent with the assumption of sequential stages of cognition and motor  
61 outputs, a growing number of studies suggested a continuous and parallel flow of information  
62 between brain systems involved in sensory, cognitive and motor processes (Cisek & Kalaska,  
63 2005; Spivey, Grosjean, & Knoblich, 2005). Continuous responses can capture the dynamics of  
64 these multiple mental processes, as well as the transitions between them (Resulaj, Kiani, Wolpert,

Revised manuscript

65 & Shadlen, 2009). Second, in experiments involving clinical populations, it can be difficult for  
66 patients to make discrete responses accurately on a keyboard, especially in patients with dementia  
67 or parkinsonism. Patients with motor function impairments (e.g., tremor, apraxia or loss of  
68 dexterity) often omit button presses, press the button too early or too late, press wrong buttons  
69 accidentally or are confused with response-button mapping. This limitation may result in a  
70 significant amount of experiment data being rejected in some studies (Wessel, Verleger,  
71 Nazarenus, Vieregge, & Kömpf, 1994), while continuous responses with natural movements can  
72 be well tolerated in patients (Limousin et al., 1997; Strafella, Dagher, & Sadikot, 2003)

73 The trajectories of continuous movements contain rich spatiotemporal information of the action,  
74 and provide unique insights into how cognitive processes unfold in time (Freeman, Dale, &  
75 Farmer, 2011; Song & Nakayama, 2009). In continuous reaching, movement trajectories showed  
76 that human participants can initiate a reaching action prior to when the target becomes fully  
77 available, and select from competing action plans at a later stage (e.g. Chapman et al., 2010;  
78 Gallivan & Chapman, 2014). In perceptual decision-making, movement trajectories from joysticks  
79 and other similar devices have been successfully used to investigate the cognitive processes  
80 underlying changes of mind (Resulaj et al., 2009), error correction (Acerbi, Vijayakumar, &  
81 Wolpert, 2017) and subjective confidence (Berg et al., 2016) that are otherwise difficult to study  
82 with key presses.

83

84 *A comparison between response modalities*

85 To extend currently available experimental findings to other devices, it is necessary to assess the  
86 consistency of performance between response modalities. More importantly, characterising the

Revised manuscript

87 consistency between response modalities may help us understand the interdependence of cognitive  
88 processes and motor systems. For example, in decision-making tasks, comparisons between  
89 saccadic eye movements and manual responses has suggested a domain general decision  
90 mechanism regardless of response modality (Gomez, Ratcliff, & Childers, 2015; Ho, Brown, &  
91 Serences, 2009), and the apparent difference in response speed is accounted for by the  
92 neuroanatomical distinctions in saccadic and manual networks (Bompas, Hedge, & Sumner, 2017).

93 The current study aimed to examine the validity and consistency of continuous joystick responses  
94 versus discrete button presses in perceptual decision-making. Participants performed a four-  
95 alternative motion discrimination task (Churchland, Kiani, & Shadlen, 2008) with two levels of  
96 perceptual difficulty. The task was to indicate the coherent motion direction from random dot  
97 kinematogram, a standard psychophysical stimulus for visual perceptual decision (Fredericksen,  
98 Verstraten, & Van De Grind, 1994; Lappin & Bell, 1976; Pilly & Seitz, 2009; Ramachandran &  
99 Anstis, 1983; Watamaniuk, Sekuler, & Williams, 1989). In two counterbalanced sessions, the  
100 participants indicated their decisions with either joystick movements or key presses. The joystick  
101 response was to move the lever from its neutral position towards one of the four cardinal directions,  
102 aligned to the coherent motion direction, and the corresponding key press was one of the four  
103 arrow keys on the keyboard. We compared raw behavioural performance (decision accuracy and  
104 mean RT) between the two response modalities and between the two levels of task difficulty. From  
105 continuous movement trajectories, we also examined whether joystick-specific measures were  
106 consistent between movement directions (i.e., trajectory length, peak velocity and acceleration  
107 time).

108 To assess whether the response modality affected the decision-making process, we fitted a drift-  
109 diffusion model (DDM) (Gold & Shadlen, 2007; Ratcliff, Smith, Brown, & McKoon, 2016) to

Revised manuscript

110 individual participant's behavioural data and compared model parameters derived from the  
111 joystick and keyboard sessions. The DDM belongs to a family of sequential sampling models of  
112 reaction time. These models assume that the decision process is governed by the accumulation of  
113 noisy sensory evidence over time until a threshold is reached (Bogacz, Brown, Moehlis, Holmes,  
114 & Cohen, 2006; Ratcliff & Smith, 2004), consistent with the electrophysiological (Britten,  
115 Shadlen, Newsome, & Movshon, 1992; Churchland et al., 2008; Hanks, Kiani, & Shadlen, 2014;  
116 Huk & Shadlen, 2005; Shadlen & Newsome, 2001) and neuroimaging (Heekeren, Marrett, &  
117 Ungerleider, 2008; Ho, Brown, & Serences, 2009; Zhang, Hughes, & Rowe, 2012) evidence on  
118 the identification of neural accumulators in the frontoparietal cortex. The current study used the  
119 DDM to decompose the observed RT distributions and accuracy into three main model  
120 components: decision threshold for the amount of evidence needed prior to a decision, drift rate  
121 for the speed of evidence accumulation, and non-decision time to account for the latencies of  
122 stimulus encoding and action initiation (Karahan, Costigan, Graham, Lawrence, & Zhang, 2019;  
123 Ratcliff & McKoon, 2008; Wagenmakers, 2009; Zhang, 2012). The latter parameter is of interest,  
124 because one may expect a difference in the latency distribution of action initiation between joystick  
125 movements and key presses.

126 Our findings demonstrated that when human participants used ballistic movements to respond with  
127 a joystick, their behavioural performance was modulated by task difficulty and similar to that from  
128 key presses during the same perceptual task. Further computational modelling analysis showed no  
129 evidence of a change in any model parameter when switching between response modalities. As  
130 such, we concluded that joystick movement is a valid response modality for extending discrete  
131 actions to continuous behaviour in psychological experiments, although participants may exhibit  
132 differences in movement trajectory measures towards different directions.

Revised manuscript

133

134 **Method**

135 *Participants*

136 Twenty-one participants (7 males, aged range 18-24 years;  $M = 20.43$  years,  $SD = 2.91$  years) took  
137 part in the study following written informed consent. All but three were right-handed. All the  
138 participants had normal or corrected-to-normal vision, and none reported a history of motor  
139 impairments or neurological disorders. The study was approved by the Cardiff University School  
140 of Psychology Ethics Committee.

141

142 *Apparatus*

143 The experiment was conducted in a behavioural testing room with dimmed light. Stimuli were  
144 displayed on a 22-inch CRT monitor with 1600x1200 pixels resolution and 85 Hz refresh rate. A  
145 chin rest was used to maintain the viewing distance and position. A joystick (Extreme 3D Pro  
146 Precision, Logitech International S.A., Switzerland) was used to record movement trajectories at  
147 85 Hz in the joystick session. The experimental setup for joystick and keyboard sessions was  
148 illustrated in Supplementary Figure 1. The joystick handle could move nearly freely, with little  
149 resistance from its neutral position within the 20% movement radius. Beyond the 20% radius, the  
150 resistance during joystick movement was approximately constant. A standard PC keyboard was  
151 used to record key presses. The experiment was written using PsychoPy 1.85.4 library (Peirce,  
152 2008).

153

Revised manuscript

154 *Stimuli*

155 In both the joystick and keyboard sessions, a random-dot kinematogram was displayed within a  
156 central invisible circular aperture of  $14.22^\circ$  diameter (visual angle). White dots were presented on  
157 a black background (100% contrast) with a dot density of 27.77 dots per  $\text{deg}^2$  per second and a dot  
158 size of  $0.14^\circ$ . Similar to previous studies (Britten et al., 1992; Pilly & Seitz, 2009; Roitman &  
159 Shadlen, 2002; Shadlen & Newsome, 2001; Zhang & Rowe, 2014), we introduced coherent motion  
160 information by interleaving three uncorrelated sequences of dot positions across frames at 85 Hz.  
161 In each frame, a fixed proportion (i.e., the motion coherence) of dots was replotted at an  
162 appropriate spatial displacement in the direction of the coherent motion ( $51.195^\circ/\text{s}$  velocity),  
163 relative to their positions three frames earlier, and the rest of the dots were presented at random  
164 locations within the aperture. Signal dots had a maximum lifetime of three frames, after which  
165 they were reassigned to random positions. The coherent motion direction in each trial was set in  
166 one of the four cardinal directions ( $0^\circ$ ,  $90^\circ$ ,  $180^\circ$  or  $270^\circ$ ).

167

168 *Task and procedure*

169 Each participant took part in two experimental sessions using keyboard or joystick as a response  
170 modality. The order of response modality was counterbalanced across participants. In both  
171 sessions, participants performed a four-alternative motion discrimination task, indicating the  
172 coherent motion direction from four possible choices ( $0^\circ$ ,  $90^\circ$ ,  $180^\circ$  or  $270^\circ$ ). Each session  
173 comprised 960 trials, which were divided into 8 blocks of 120 trials. Each block had 15 repetitions  
174 of each of the four motion directions and two difficulty conditions. The motion coherence was set  
175 to 10% in the “Difficult” condition and 20% in the “Easy” condition. Feedback on the mean



Revised manuscript

176 decision accuracy was provided after each block. The order of the conditions was pseudo-  
177 randomized across sessions and participants, ensuring that the same direction and difficulty  
178 condition did not occur in four consecutive trials. In the keyboard session, the participants  
179 responded with four arrow keys corresponding to the coherent motion direction (right - 0°, up -  
180 90°, left - 180° and down - 270°). In the joystick session, the participants were instructed to indicate  
181 the motion direction with an appropriate joystick movement from the joystick's central position  
182 towards one of the four edges (right - 0°, up - 90°, left - 180° and down - 270°).

183 Every trial started with a 400 ms fixation period (Figure 1a). The random dot kinematogram  
184 appeared after the fixation period for a maximum of 3000 ms or until response. In the keyboard  
185 session, stimuli disappeared after a button press. In joystick condition, stimuli disappeared when  
186 the participants stopped joystick movement. The chosen stopping rule was when the joystick  
187 position did not change in the last four sampling points, and its position was outside of the 20%  
188 motion radius. After response, a blank screen was presented as the intertrial interval, with a  
189 duration uniformly randomized between 1000 and 1400 ms.

190 The response time (RT) in the keyboard session was defined as the latency between the onset of  
191 random-dot kinematogram and the time of key press. In the joystick session, the RT was defined  
192 as the duration between the onset of the random-dot kinematogram and the first time when the  
193 joystick's position left the 20% movement radius from its neutral position. It coincided with the  
194 first noticeable increase in the velocity of the movement from the stimulus onset. Participants'  
195 choice in the joystick session was one of the four cardinal directions (i.e., 0°, 90°, 180° and 270°)  
196 closest to the last position of the joystick.

197

Revised manuscript

198 *Drift-diffusion model (DDM) analysis*

199 We fitted the DDM to each participant's response time distributions and accuracy. The DDM  
200 decomposes the behavioural data into four key model parameters (Ratcliff & McKoon, 2008). (1)  
201 The decision threshold ( $a$ ) denotes the distance between the two decision boundaries. (2) The mean  
202 drift rate ( $v$ ) denotes the strength of sensory information. (3) The starting point ( $z$ ) denotes the  
203 response bias towards one of the two alternatives. (4) The non-decision time ( $T_{er}$ ) denotes the  
204 latencies of stimulus encoding and response initiation. In addition, the DDM can be extended to  
205 include trial-by-trial variability in drift rate  $s_v$  and non-decision time  $s_r$ , which improves model fit  
206 to the data (Ratcliff & McKoon, 2008). The DDM predicts the decision time as the duration of the  
207 accumulation process and the observed RT as the sum of the decision time and  $T_{er}$  (Figure 1B).

208 Similar to previous studies (Churchland et al., 2008), we simplified the four-alternative forced  
209 choice task in the current study to a binary decision problem for model fitting. This was achieved  
210 by separately grouping trials with correct responses and trials with incorrect responses. The  
211 behavioural task was then reduced to a binary choice between a correct and an incorrect alternative.  
212 We used the hierarchical drift-diffusion model (HDDM) toolbox to fit the behavioural data  
213 (Wiecki, Sofer, & Frank, 2013). The HDDM implemented a hierarchical Bayesian model  
214 (Vandekerckhove, Tuerlinckx, & Lee, 2011) for estimating the DDM parameters, which assumes  
215 that the model parameters for individual participants are sampled from group-level distributions at  
216 a higher hierarchy. Given the observed experimental data, the HDDM used Markov chain Monte  
217 Carlo (MCMC) approaches to estimate the joint posterior distribution of all individual- and group-  
218 level parameters. The posterior parameter distributions can be used directly for Bayesian inference  
219 (Gelman et al., 2014), and this Bayesian approach has been shown to be robust in recovering model

Revised manuscript

220 parameters when limited data are available (Ratcliff & Childers, 2015; Wiecki et al., 2013; Zhang  
221 et al., 2016).

222 We applied a few constraints to the model parameters based on our task design. First, we allowed  
223 all the model parameters ( $a$ ,  $v$ ,  $Ter$ ,  $s_v$ , and  $s_t$ ) to vary between the two response modalities. Second,  
224 the mean drift rate  $v$  was further allowed to vary between task difficulties (easy, difficult) and  
225 correct directions (up, down, left and right). Third, the starting point  $z$  was fixed at 0.5, suggesting  
226 that there was no bias towards the two decision boundaries and the equal amount of evidence was  
227 required for a correct and incorrect decision. This was because the participants did not have  $a$   
228 *priori* knowledge about the correct alternative at the beginning of each trial.

229 We generated 15,000 samples from the joint posterior distribution of all model parameters by using  
230 MCMC sampling (Gamerman & Lopes, 2006). The initial 7,000 samples were discarded as burn-  
231 in for stable posterior estimates. Geweke diagnostic (Cowles & Carlin, 1996) and autocorrelation  
232 were used to assess the convergence of the Markov chains in the last 8,000 samples. All parameter  
233 estimates were converged after 15,000 samples.

234

### 235 *Data analysis*

236 First, we used both Bayesian and frequentist repeated-measures ANOVA to make inferences on  
237 behavioural measures (JASP Team, 2018). For frequentist ANOVAs, Greenhouse-Geisser  
238 correction was applied when the assumption of sphericity was violated. For Bayesian ANOVAs,  
239 we followed the standard heuristic to characterize the strength of evidence based on the Bayes  
240 factor ( $BF_{10}$ ) (Wagenmakers, Lee, Lodewyckx, & Iverson, 2008), which can provide evidence  
241 supporting either null ( $BF_{10} < 1$ ) or alternative ( $BF_{10} > 1$ ) hypotheses. A  $BF_{10}$  between [1, 3] (or [0,

Revised manuscript

242 1/3)) suggests weak evidence for the alternative (or null) hypothesis. A  $BF_{10}$  between [3, 10] (or  
243 [1/10, 1/3]) suggests moderate or compelling evidence for the alternative (or null) hypothesis. A  
244  $BF_{10}$  larger than 10 (or smaller than 1/10), suggests strong evidence for the alternative (or null)  
245 hypothesis.

246 Second, to quantify the difference of RT distributions between response modalities, we used the  
247 Kolmogorov-Smirnov test (Pratt & Gibbons, 1981), a non-parametric statistical measure of  
248 difference between two one-dimensional empirical distributions.

249 Third, to compare a fitted DDM parameter between two conditions (e.g., between response  
250 modalities or between task difficulties), we used Bayesian hypothesis testing (Bayarri & Berger,  
251 2004; Gelman et al., 2014; Kruschke, 2015; Lindley, 1965) to make inferences from the posterior  
252 parameter distributions, under the null hypothesis that the parameter value is equal between the  
253 two conditions.

254 More specifically, we first calculated the distribution of the parameter difference from the two  
255 MCMC chains of the two conditions, and we obtained the 95% highest density interval (HDI) of  
256 that difference distribution between the two conditions. We then set a region of practical  
257 equivalence (ROPE) around the null value (i.e., 0 for the null hypothesis), which encloses the  
258 values of the posterior difference that are deemed to be negligible from the null value 0 (Kruschke,  
259 2013). In each Bayesian inference, the ROPE was set empirically from the two MCMC chains of  
260 the two conditions under comparison. For each of the two conditions, we calculated the 95% HDI  
261 of the difference distribution between odd and even samples from that condition's MCMC chain.  
262 This 95% HDI from a single MCMC chain can be considered as negligible values around the null,  
263 because posterior samples from different portions of the same chain are representative values of  
264 the same parameter. That is, we accepted that the null hypothesis is true when comparing the

Revised manuscript

265 difference between odd and even samples from the same MCMC chain. The ROPE was then set  
266 to the widest boundaries of the two 95% HDIs of the two conditions.

267 From the 95% HDI of the difference distribution and the ROPE, a Bayesian  $P$ -value was  
268 calculated. To avoid confusion, we used  $p$  to refer to classical frequentist  $p$ -values, and  $P_{pID}$  to refer  
269 to Bayesian  $P$ -values based on posterior parameter distributions. If ROPE is completely contained  
270 within 95% HDI,  $P_{pID} = 1$  and we accept the null hypothesis (i.e., the parameter values are equal  
271 between the two conditions). If ROPE is completely outside 95% HDI,  $P_{pID} = 0$  and we reject the  
272 null hypothesis (i.e., the parameter values differ between the two conditions). If ROPE and 95%  
273 HDI partially overlap,  $P_{pID}$  equals to the proportion of the 95% HDI that falls within the ROPE,  
274 which indicates the probability that the parameter value is *practically* equivalent between the two  
275 conditions (Kruschke & Liddell, 2018).

276

## 277 **Results**

### 278 *Behavioural results*

279 The behavioural performance of the four-alternative motion discrimination task was quantified by  
280 accuracy (proportion of correct responses, Figure 2A) and mean reaction time (RT, Figure 2B).  
281 We compared the behavioural performance between response modalities (joystick or keyboard),  
282 task difficulties (easy or difficult) and motion directions (up, down, left or right) using three-way  
283 Bayesian and frequentist repeated-measure ANOVAs. Across the two response modalities,  
284 participants showed decreased accuracy ( $BF_{10} = 5.112 \times 10^{30}$ ;  $F(1,20) = 292.709$ ,  $p < 0.001$ ) and  
285 increased mean RT ( $BF_{10} = 1.458 \times 10^{18}$ ;  $F(1,20) = 63.163$ ,  $p < 0.001$ ) in the more difficult  
286 condition. There was compelling evidence against the main effect of response modality on

Revised manuscript

287 accuracy ( $BF_{10} = 0.124$ ;  $F(1,20) = 0.083$ ,  $p = 0.776$ ) and weak evidence against the main effect of  
288 response modality on mean RT ( $BF_{10} = 0.560$ ;  $F(1,20) = 0.495$ ,  $p = 0.490$ ). These results indicated  
289 similar behavioural performance between joystick and keyboard responses.

290 When comparing the behavioural performance between motion directions, there was compelling  
291 evidence against the main effect on accuracy ( $BF_{10} = 0.185$ ;  $F(2.248, 44.961) = 0.107$ ,  $p = 0.357$ ).

292 On mean RT, the frequentist ANOVA suggested a significant main effect of motion direction  
293 ( $F(2.853, 57.052) = 3.021$ ,  $p = 0.039$ ), but this results was supported by neither post-hoc tests  
294 ( $p > 0.139$  in all post-hoc comparisons, Bonferroni corrected) or Bayesian ANOVA ( $BF_{10} = 0.305$ ).

295 Furthermore, there was a significant interaction on accuracy between task difficulty and motion  
296 direction ( $F(2.586, 51.718) = 6.317$ ,  $p = 0.002$ ), although this was again not supported by Bayesian  
297 analysis ( $BF_{10} = 0.299$ ). There was evidence against all the other interactions on accuracy ( $BF_{10} <$   
298  $0.179$ ;  $p > 0.228$ ) and mean RT ( $BF_{10} < 0.199$ ;  $p > 0.083$ ).

299 The results above suggested no systematic bias at the group level when comparing responses from  
300 a joystick and a keyboard. However, the consistency of behavioural performance between response  
301 modalities could vary between participants. For experiments with multiple response modalities,  
302 the researcher may want to confirm whether the consistency between response modalities is  
303 maintained across experimental conditions. This would allow, for example, a pre-screening  
304 procedure to identify participants with high response consistency to be recruited for further  
305 experiments. Here, we used Kolmogorov-Smirnov (K-S) statistics to quantify the difference of  
306 individual participant's RT distributions between the joystick and keyboard sessions in each  
307 difficulty condition, separately for correct and incorrect trials. There was strong evidence of a  
308 positive correlation between the K-S statistics of the easy and difficult conditions (correct trials:  
309  $BF_{10} = 3.647 \times 10^6$ ,  $R = 0.92$ ,  $p < 0.001$ ; incorrect trials:  $BF_{10} = 4526.00$ ,  $R = 0.82$ ,  $p < 0.001$ )

Revised manuscript

310 (Figure 2C). Therefore, the difference in behavioural performance between response modalities  
311 was consistent within participants across difficulty levels.

312

313 *Hierarchical drift-diffusion model analyses*

314 To compare the underlying decision-making process between joystick and keyboard responses, we  
315 simplified the four-alternative motion discrimination task to a binary decision task (Churchland et  
316 al., 2008; see also “Drift-diffusion model” section) and fitted the drift-diffusion model (DDM) to  
317 the behavioural data using the hierarchical DDM (HDDM) toolbox (Wiecki et al., 2013). The  
318 DDM decomposed individual participant’s behavioural data into model parameters of latent  
319 psychological processes, and the HDDM toolbox allowed to estimate the joint posterior estimates  
320 of model parameters using hierarchical Bayesian approaches. To evaluate the model fit, we  
321 generated model predictions by simulations with the posterior estimates of the model parameters.  
322 There was a good agreement between the observed data and the model simulations across response  
323 modalities, task difficulties and motion directions (Figure 3).

324 With no *a priori* knowledge on the effect of response modality on the decision-making process,  
325 we allowed all model parameters to vary between joystick and keyboard responses: the boundary  
326 separation  $a$ , the mean drift rate  $\nu$ , the mean non-decision time  $T_{er}$ , the trial-by-trial variability of  
327 drift rate  $s_\nu$ , and the trial-by-trial variability of non-decision time  $s_t$  (Table 1). The mean drift rate  
328 was further allowed to vary between task difficulties and motion directions. We performed  
329 Bayesian hypothesis testing on the posterior parameter estimates between response modalities  
330 (Bayarri & Berger, 2004; Gelman et al., 2014; Kruschke, 2015; Lindley, 1965). This analysis

Revised manuscript

331 yielded 95% HDI of the parameter difference between the joystick and keyboard sessions, as well  
332 as Bayesian  $P$ -values  $P_{PID}$  (see “Data analysis” section for details).

333 For all the model parameters, we could not reject the null hypothesis that the posterior parameter  
334 estimates are practically equal between the joystick and keyboard sessions. The  $P_{PID}$ , which  
335 quantifies the probability that the model parameter is practically equal between the two conditions,  
336 ranged from 0.641 to 0.964 (Table 1). Therefore, there was no evidence to support that switching  
337 from keyboard to joystick altered the decision-making process. Next, because the mean drift rate  
338 is often assumed to increase with decreased task difficulty (Ratcliff & McKoon, 2008), we  
339 compared the drift rate averaged from the joystick and keyboard sessions between easy and  
340 difficult conditions. As expected, the drift rate was larger in the easy compared with the difficult  
341 condition in all motion directions (up: 95% HDI = [0.589, 1.613],  $P_{PID}=0$ ; down: 95% HDI =  
342 [0.930, 1.958],  $P_{PID}=0$ ; left: 95% HDI = [1.204, 2.227],  $P_{PID}=0$ ; right: 95% HDI = [1.185, 2.214],  
343  $P_{PID}=0$ ).

344

345 *Additional measures from joystick trajectories*

346 In the joystick session, the participants’ movement trajectories were close to the four cardinal  
347 directions (Figure 4A). Continuous movements with the joystick enabled to acquire additional  
348 single trial behavioural measures beyond that possible from simple key presses. We examined  
349 three such measures: peak velocity (Figure 4B), acceleration time (Figure 4C) and trajectory length  
350 (Figure 4D). These additional joystick measures were subsequent to accuracy and RT. In the  
351 current study, we did not expect them to have critical influence on the two primary behavioural  
352 measures. Hence our analyses were focused on the effects of movement direction and task



Revised manuscript

353 difficulty on the trajectory measures. However, we acknowledged that, in experiments with more  
354 complex movement trajectories, decisions may be more directly coupled to continuous motor  
355 responses (Song & Nakayama, 2009).

356 We calculated the action velocity as the rate of changes of joystick position. There was a single  
357 peak of action velocity in each trial, consistent with the ballistic nature of the movement. There  
358 was strong evidence for the main effect of response direction on the peak velocity (Figure 5B,  $BF_{10}$   
359  $= 3.900 \times 10^{24}$ ,  $F(2.000, 40.002) = 39.25$ ,  $p < 0.001$ ), moderate evidence for the main effect of  
360 difficulty ( $BF_{10} = 4.612$ ,  $F(1,20) = 22.70$ ,  $p < 0.001$ ) and strong evidence for the interaction  
361 between direction and difficulty ( $BF_{10} = 58.433$ ,  $F(2.841,56.813) = 30.58$ ,  $p < 0.001$ ).

362 We calculated the acceleration time as the latency between the RT and the time of peak velocity  
363 (Figure 5C). There was strong evidence for the main effect of response direction ( $BF_{10} = 1147.376$ ,  
364  $F(2.253, 45.05) = 4.741$ ,  $p = 0.011$ ). We found moderate evidence against difficulty level ( $BF_{10} =$   
365  $0.172$ ,  $F(1,20) = 0.178$ ,  $p = 0.677$ ). Frequentist ANOVA showed a significant interaction between  
366 the response direction and difficulty levels ( $F(2.853, 57.053) = 4.470$ ,  $p = 0.008$ ), which was not  
367 supported by the Bayes factor ( $BF_{10} = 0.256$ ).

368 We calculated the trajectory length as the sum of the Euclidean distance between adjacent joystick  
369 positions in each trial (Figure 5D). There was no compelling evidence for the main effect of  
370 response direction on trajectory length ( $BF_{10} = 1.759$ ;  $F(3, 60) = 1.944$ ,  $p = 0.151$ ), nor the main  
371 effect of task difficulty ( $BF_{10} = 0.450$ ,  $F(1, 20) = 3.171$ ,  $p = 0.09$ ). The evidence against the  
372 interaction between direction and difficulty was strong ( $BF_{10} = 0.090$ ,  $F(3, 60) = 0.978$ ,  $p = 0.409$ ).

373 In summary, the peak action velocity of joystick movements was affected by both action direction  
374 and task difficulty, and acceleration time was affected only by trajectory direction. There was no

Revised manuscript

375 compelling evidence to support that trajectory length was affected by action direction or task  
376 difficulty.

377

378 **Discussion**

379 The current study systematically compared the consistency between continuous and discrete  
380 responses during rapid decision-making. In a four-alternative motion discrimination task, joystick  
381 movements and key presses led to similar accuracy and mean RT. Further modelling analysis with  
382 hierarchical DDM showed no evidence in supporting a change of any model parameters between  
383 response modalities. Together, our findings provide evidence for the validity of using continuous  
384 joystick movement as a reliable response modality in behavioural experiments.

385

386 *Behavioural measures*

387 In both joystick and keyboard sessions, participants had lower accuracy and longer mean RT in  
388 the more difficult condition (i.e., lower motion coherence), in line with previous findings with  
389 similar tasks (Britten et al., 1992; Pilly & Seitz, 2009; Ramachandran & Anstis, 1983; Roitman &  
390 Shadlen, 2002). Using Bayesian statistics, we found evidence that response modality (joystick  
391 motion or key press) did not affect either accuracy or mean RT, confirming the validity of using  
392 joystick as a response device in decision-making tasks. Importantly, across participants, the  
393 difference in the RT distributions between response modalities was positively correlated between  
394 easy and difficult conditions. Therefore, participants with similar behavioural performance  
395 between response modalities maintained their consistency between experimental conditions.

Revised manuscript

396 Joystick positions estimated at a high sampling rate enabled additional behavioural measures  
397 beyond on/off key presses. In the current study, most of the movement trajectories were along the  
398 four cardinal directions (Figure 5A). The averaged trajectory length was close to 1 (Figure 5D),  
399 which was the shortest distance from the joystick's neutral position to the maximum range,  
400 suggesting that the participants were able to make accurate and ballistic movements following the  
401 task instruction. Nevertheless, it is worth noting that the movement direction affected the peak  
402 velocity and acceleration time. This may be due to the difference in upper limb muscle contractions  
403 when moving the joystick towards different directions (Oliver, Northey, Murphy, MacLean, &  
404 Sexsmith, 2011). Therefore, for future behavioural experiments relying on sensitive trajectories  
405 measures, we suggest extra cautious on the effects of ergonomics and human motor physiology,  
406 especially for rapid movements as in the current study. One potential solution would be to acquire  
407 baseline recordings of the movements to be expected during the experiment, which can then be  
408 used to compensate measurement biases.

409

410 *Model-based measures*

411 The DDM and other sequential sampling models are commonly used to investigate the cognitive  
412 processes underlying rapid decision-making (Bogacz et al., 2006; Smith & Ratcliff, 2004). In the  
413 current study, the mean drift rate increased in the easier task condition, consistent with previous  
414 modelling results (Ratcliff & McKoon, 2008). The combination of posterior parameter estimation  
415 and Bayesian inference allowed us to obtain the probability of the parameter being practically  
416 equal, a more informative measure than frequentist  $p$ -values (Kruschke, 2015). Although our  
417 results suggested that most parameter values had high probabilities to remain the same between

Revised manuscript

418 response modalities (Table 1), we could not accept the null hypothesis for certain (which requires  
419  $P_{PID} = 1$ ) and need more data to confirm the inference.

420 We highlighted two model parameters with low  $P_{PID}$  values, which indicate that, with additional  
421 observed data from future experiments, the posterior model parameters might be in favour of the  
422 alternative hypothesis (i.e., a difference between response modalities). First, when switching from  
423 key presses to joystick movements, there was a small increase in the mean non-decision time ( $P_{PID}$   
424 = 0.658). Second, responding with a joystick resulted in a slightly decreased decision threshold  
425 ( $P_{PID} = 0.872$ ). Several previous studies showed that instructing to respond faster or more  
426 accurately could efficiently modulate participants' behaviour (Beersma et al., 2003; Schouten &  
427 Bekker, 1967; Wickelgren, 1977). The decision threshold plays a substantial role under such  
428 speed-accuracy instructions (Mulder et al., 2013; Rae, Heathcote, Donkin, Averell, & Brown,  
429 2014; Ratcliff & McKoon, 2008; Starns & Ratcliff, 2014; Zhang & Rowe, 2014): a decrease of  
430 threshold is accompanied with faster reaction speed and lower accuracy. If participants do  
431 implicitly trade accuracy for speed when switching from keyboard to joystick movements, this  
432 cognitive discrepancy needs to be considered when conducting experiments involving continuous  
433 responses. One hypothesis for this potential behavioural change is that continuous joystick  
434 movements allow participants to change or correct their responses later in a trial (Albantakis &  
435 Deco, 2009; Gallivan & Chapman, 2014; Gallivan, Logan, Wolpert, & Flanagan, 2016; Selen,  
436 Shadlen, & Wolpert, 2012), and this response flexibility may lead to reduced deliberation in initial  
437 movements.

438 The trial-by-trial variabilities in drift rate and non-decision time also had  $P_{PID}$  values. Empirically,  
439 across-trial variability was introduced in DDM to improve the model fit to RT distributions  
440 (Ratcliff & McKoon, 2008), although the functional significance of these parameters to the

Revised manuscript

441 decision process is still unclear. Across-trial variability in the drift rate produces different RT  
442 between correct and error trials (Ratcliff & Rouder, 1998), and across-trial variability in the non-  
443 decision time accounts for the large variability in trials with short RT across experimental  
444 conditions (Ratcliff & Tuerlinckx, 2002). These model parameters allow the DDM to account for  
445 the subtle differences in the shape of RT distributions between response modalities. Future studies  
446 could apply formal model comparison to evaluate the need of trial-by-trial variability in modelling  
447 joystick responses.

448

449 *The use of joystick and its validity*

450 We aimed to establish the validity of joystick response in rapid decision-making tasks. More  
451 specifically, we examined whether response modality (joystick movements vs. key presses) alters  
452 the raw behavioural measures (RT and accuracy) and underlying cognitive processes. We found  
453 that both behavioural measures and model parameters from cognitive modelling did not differ  
454 significantly between response modalities. In other words, using joystick movements to indicate  
455 choices of perceptual decisions elicit behavioural and cognitive characteristics similar to those  
456 from conventional key presses.

457 Motion discrimination based on random dot kinematogram is a typical paradigm for simple  
458 decisions. The same computational mechanism of evidence accumulation has been suggested to  
459 account for the cognitive processes underlying a broad range of decision-making tasks, spanning  
460 across sensory modalities (O'Connell, Dockree, & Kelly, 2012) and cognitive domains (Gold &  
461 Shadlen, 2007). Therefore, we expect that the validity of joystick response established in the

Revised manuscript

462 current study can be extended to experimental paradigms in which participants make rapid choices  
463 with motor actions (Ratcliff & McKoon, 2008).

464 The joystick as a response modality has been successfully applied in ageing and clinical  
465 populations, in which conventional key presses may be error-prone due to impaired dexterity. Both  
466 older and young adults can operate joysticks in visuomotor tasks with similar response patterns  
467 (Kramer, Larish, Weber, & Bardell, 1999). Previous studies showed that older adults can complete  
468 multiple hour-long cognitive training sessions with joystick responses, and the performance  
469 benefit persisted for 6 months after training (Anguera et al., 2013). In patients with  
470 neurodegenerative diseases, volitional joystick movements have been successfully used to  
471 examine the motor deficits and underlying neural abnormalities (Kew et al., 1993). This evidence  
472 suggested that the use of joystick can be well tolerated in older adults and patients.

473 In the current study, the participants did not report fatigue after joystick or keyboard sessions,  
474 which lasted approximately 45 minutes each. Other paradigms with longer experimental sessions  
475 and more intense joystick movements may impose a challenge to participants' stamina.  
476 Nevertheless, it is possible to use measures from the continuous joystick recording (Kahol, Smith,  
477 Brandenberger, Ashby, & Ferrara, 2011) or concurrent physiological recording (Mascord & Heath,  
478 1992) to identify the onset of fatigue prior to performance deterioration.

479 One may ask if joystick responses provide any additional value over conventional key presses.  
480 Here, we showed that, even in simple ballistic movements, joystick-specific measures (e.g. action  
481 velocity) can be affected by the task difficulty, providing additional information on behavioural  
482 performance in addition to RT and accuracy. It is yet to be determined whether continuous  
483 responses provide independent information from discrete responses (Freeman, 2018; Freeman &  
484 Ambady, 2010; Stillman, Medvedev, & Ferguson, 2017). However, the capacity of recoding

Revised manuscript

485 continuous responses via joysticks enables new experimental designs to probe the continuous  
486 interplay between action, perception and cognition. For example, the ongoing locomotion can  
487 modify the sensory information flow (Ayaz, Saleem, Schölvink, & Carandini, 2013; Souman,  
488 Freeman, Eikmeier, & Ernst, 2010).

489 *Future directions*

490 Three issues require further consideration. First, we only used a joystick to record movement  
491 trajectories, which is commonly used and widely available in behavioural testing labs. There are  
492 many other devices capable for recording continuous responses, such as computer mouse (e.g.  
493 Koop & Johnson, 2011), optic motion sensor (e.g. Chapman et al., 2010) and robotic arms  
494 (Abrams, Meyer, & Kornblum, 1990; Archambault, Caminiti, & Battaglia-Mayer, 2009; Berg et  
495 al., 2016; Burk, Ingram, Franklin, Shadlen, & Wolpert, 2014; Resulaj et al., 2009). The current  
496 study offered a comprehensive comparison between key presses and joystick movements, but the  
497 measures from other devices are yet to be validated. We also offered a practical solution to measure  
498 RT from joystick movement comparable to that from key presses, taking in to account the small  
499 resistive forces near the joystick's neutral position. To facilitate future research, we have made our  
500 data and analysis scripts openly available (<https://osf.io/6fpq4>).

501 Second, we instructed participants to make directional movements in the joystick session, which  
502 allows for intra-individual comparisons between response modalities. Motion trajectories  
503 suggested that the participants mainly made ballistic actions towards one of the four cardinal  
504 directions (Figure 5A). One could explore the further potential of continuous responses in  
505 behavioural tasks, such as in response to the change of mind (Berg et al., 2016; Burk et al., 2014;  
506 Resulaj et al., 2009) or external distractions (Gallivan & Chapman, 2014).

Revised manuscript

507 Third, the DDM required the behavioural data to be presented as binary choices (Ratcliff &  
508 McKoon, 2008). To meet this constraint, we simplified our four-choice task data into correct and  
509 incorrect decisions, and incorrect responses contained errors towards three different directions  
510 from the correct motion direction. Our modelling results provided a good fit to the observed data.  
511 It would be useful to extend the analysis using other models that are designed for decision problems  
512 with multiple alternatives (Bogacz, Usher, Zhang, & McClelland, 2007; Brown & Heathcote,  
513 2008; Usher & McClelland, 2001; Wong & Wang, 2006; Zhang & Bogacz, 2009), although a  
514 hierarchical Bayesian implementation of those more complex models is beyond the scope of the  
515 current study.

516 In conclusion, our results validated the joystick as a reliable device for continuous responses during  
517 rapid decision-making. Compared with key presses, the additional complexity and continuity  
518 associated with joystick movements did not affect raw behavioural measures such as accuracy and  
519 mean RT, as well as underlying decision-making processes. However, we highlighted the effects  
520 of movement direction on continuous trajectory measures. Researchers should be cautious when  
521 adopting experimental designs that require complex movement trajectories.



Revised manuscript

522 Open practices statement:

523 All the data and the materials for the experiment and analysis are available at <https://osf.io/6fpq4>

524 **References**

525 Abrams, R. A., Meyer, D. E., & Kornblum, S. (1990). Eye-hand coordination: Oculomotor control  
526 in rapid aimed limb movements. *Journal of Experimental Psychology: Human Perception  
527 and Performance*, *16*, 248–267.

528 Acerbi, L., Vijayakumar, S., & Wolpert, D. M. (2017). Target Uncertainty Mediates Sensorimotor  
529 Error Correction. *PLOS ONE*, *12*, e0170466.

530 Albantakis, L., & Deco, G. (2009). The encoding of alternatives in multiple-choice decision  
531 making. *Proceedings of the National Academy of Sciences*, *106*, 10308–10313.

532 Anguera, J. A., Boccanfuso, J., Rintoul, J. L., Al-Hashimi, O., Faraji, F., Janowich, J., ... Gazzaley,  
533 A. (2013). Video game training enhances cognitive control in older adults. *Nature*, *501*,  
534 97–101.

535 Archambault, P. S., Caminiti, R., & Battaglia-Mayer, A. (2009). Cortical Mechanisms for Online  
536 Control of Hand Movement Trajectory: The Role of the Posterior Parietal Cortex. *Cerebral  
537 Cortex*, *19*, 2848–2864.

538 Ayaz, A., Saleem, A. B., Schölvinc, M. L., & Carandini, M. (2013). Locomotion Controls Spatial  
539 Integration in Mouse Visual Cortex. *Current Biology*, *23*, 890–894.

540 Bayarri, M. J., & Berger, J. O. (2004). The Interplay of Bayesian and Frequentist Analysis.  
541 *Statistical Science*, *19*, 58–80.

Revised manuscript

- 542 Beersma, B., Hollenbeck, J. R., Humphrey, S. E., Moon, H., Conlon, D. E., & Ilgen, D. R. (2003).  
543 COOPERATION, COMPETITION, AND TEAM PERFORMANCE: TOWARD A  
544 CONTINGENCY APPROACH. *Academy of Management Journal*, *46*, 572–590.
- 545 Berg, R. van den, Anandalingam, K., Zylberberg, A., Kiani, R., Shadlen, M. N., & Wolpert, D. M.  
546 (2016). A common mechanism underlies changes of mind about decisions and confidence.  
547 *ELife*, *5*, e12192.
- 548 Bogacz, R., Brown, E., Moehlis, J., Holmes, P., & Cohen, J. D. (2006). The physics of optimal  
549 decision making: A formal analysis of models of performance in two-alternative forced-  
550 choice tasks. *Psychological Review*, *113*, 700–765.
- 551 Bogacz, R., Usher, M., Zhang, J., & McClelland, J. L. (2007). Extending a biologically inspired  
552 model of choice: multi-alternatives, nonlinearity and value-based multidimensional choice.  
553 *Philosophical Transactions of the Royal Society of London B: Biological Sciences*, *362*,  
554 1655–1670.
- 555 Bompas, A., Hedge, C., & Sumner, P. (2017). Speeded saccadic and manual visuo-motor  
556 decisions: Distinct processes but same principles. *Cognitive Psychology*, *94*, 26–52.
- 557 Britten, K. H., Shadlen, M. N., Newsome, W. T., & Movshon, J. A. (1992). The analysis of visual  
558 motion: a comparison of neuronal and psychophysical performance. *The Journal of*  
559 *Neuroscience*, *12*, 4745–4765.
- 560 Brown, S. D., & Heathcote, A. (2008). The simplest complete model of choice response time:  
561 Linear ballistic accumulation. *Cognitive Psychology*, *57*, 153–178.
- 562 Burk, D., Ingram, J. N., Franklin, D. W., Shadlen, M. N., & Wolpert, D. M. (2014). Motor Effort  
563 Alters Changes of Mind in Sensorimotor Decision Making. *PLOS ONE*, *9*, e92681.

Revised manuscript

- 564 Chapman, C. S., Gallivan, J. P., Wood, D. K., Milne, J. L., Culham, J. C., & Goodale, M. A.  
565 (2010). Reaching for the unknown: Multiple target encoding and real-time decision-  
566 making in a rapid reach task. *Cognition*, *116*, 168–176.
- 567 Churchland, A. K., Kiani, R., & Shadlen, M. N. (2008). Decision-making with multiple  
568 alternatives. *Nature Neuroscience*, *11*, 693–702.
- 569 Cisek, P., & Kalaska, J. F. (2005). Neural Correlates of Reaching Decisions in Dorsal Premotor  
570 Cortex: Specification of Multiple Direction Choices and Final Selection of Action. *Neuron*,  
571 *45*, 801–814.
- 572 Cowles, M. K., & Carlin, B. P. (1996). Markov Chain Monte Carlo Convergence Diagnostics: A  
573 Comparative Review. *Journal of the American Statistical Association*, *91*, 883–904.
- 574 Fredericksen, R. E., Verstraten, F. A. J., & Van De Grind, W. A. (1994). Temporal integration of  
575 random dot apparent motion information in human central vision. *Vision Research*, *34*,  
576 461–476.
- 577 Freeman, J. B. (2018). Doing Psychological Science by Hand. *Current Directions in Psychological*  
578 *Science*, *27*, 315–323.
- 579 Freeman, J. B., & Ambady, N. (2010). MouseTracker: Software for studying real-time mental  
580 processing using a computer mouse-tracking method. *Behavior Research Methods*, *42*,  
581 226–241.
- 582 Freeman, J. B., Dale, R., & Farmer, T. A. (2011). Hand in Motion Reveals Mind in Motion.  
583 *Frontiers in Psychology*, *2*.
- 584 Gallivan, J. P., & Chapman, C. S. (2014). Three-dimensional reach trajectories as a probe of real-  
585 time decision-making between multiple competing targets. *Frontiers in Neuroscience*, *8*.

Revised manuscript

- 586 Gallivan, J. P., Logan, L., Wolpert, D. M., & Flanagan, J. R. (2016). Parallel specification of  
587 competing sensorimotor control policies for alternative action options. *Nature*  
588 *Neuroscience*, *19*, 320–326.
- 589 Gamerman, D., & Lopes, H. F. (2006). *Markov chain Monte Carlo stochastic simulation for*  
590 *Bayesian inference*. Boca Raton: Taylor & Francis.
- 591 Gelman, A., Carlin, J. B., Stern, H. S., Dunson, D. B., Vehtari, A., & Rubin, D. B. (2014). *Bayesian*  
592 *data analysis*.
- 593 Gold, J. I., & Shadlen, M. N. (2007). The neural basis of decision making. *Annual Review of*  
594 *Neuroscience*, *30*, 535–574.
- 595 Hanks, T., Kiani, R., & Shadlen, M. N. (2014). A neural mechanism of speed-accuracy tradeoff in  
596 macaque area LIP. *ELife*, *3*, e02260.
- 597 Heekeren, H. R., Marrett, S., & Ungerleider, L. G. (2008). The neural systems that mediate human  
598 perceptual decision making. *Nature Reviews Neuroscience*, *9*, 467–479.
- 599 Ho, T. C., Brown, S., & Serences, J. T. (2009). Domain General Mechanisms of Perceptual  
600 Decision Making in Human Cortex. *Journal of Neuroscience*, *29*, 8675–8687.
- 601 Huk, A. C., & Shadlen, M. N. (2005). Neural Activity in Macaque Parietal Cortex Reflects  
602 Temporal Integration of Visual Motion Signals during Perceptual Decision Making. *The*  
603 *Journal of Neuroscience*, *25*, 10420–10436.
- 604 JASP Team. (2018). *JASP (Version 0.8.6)*.
- 605 Kahol, K., Smith, M., Brandenberger, J., Ashby, A., & Ferrara, J. J. (2011). Impact of Fatigue on  
606 Neurophysiologic Measures of Surgical Residents. *Journal of the American College of*  
607 *Surgeons*, *213*, 29–34.

Revised manuscript

- 608 Karahan, E., Costigan, A. G., Graham, K. S., Lawrence, A. D., & Zhang, J. (2019). Cognitive and  
609 white-matter compartment models revealed the contribution of microstructural variability  
610 along sensorimotor tracts to simple reaction time. *Journal of Neuroscience, in press*.
- 611 Kew, J. J. M., Goldstein, L. H., Leigh, P. N., Abrahams, S., Cosgrave, N., Passingham, R. E., ...  
612 Brooks, D. J. (1993). The relationship between abnormalities of cognitive function and  
613 cerebral activation in amyotrophic lateral sclerosisA neuropsychological and positron  
614 emission tomography study. *Brain, 116*, 1399–1423.
- 615 Koop, G. J., & Johnson, J. G. (2011). Response dynamics: A new window on the decision process.  
616 *Judgment and Decision Making, 6*, 750.
- 617 Kramer, A. F., Larish, J. L., Weber, T. A., & Bardell, L. (1999). Training for executive control:  
618 Task coordination strategies and aging. In *Attention and Performance. Attention and*  
619 *performance XVII: Cognitive regulation of performance: Interaction of theory and*  
620 *application* (pp. 617–652). Cambridge, MA, US: The MIT Press.
- 621 Kruschke, J. K. (2013). Bayesian estimation supersedes the t test. *Journal of Experimental*  
622 *Psychology: General, 142*, 573–603.
- 623 Kruschke, J. K. (2015). *Doing Bayesian data analysis: a tutorial with R, JAGS, and stan* (2E  
624 [edition]). Boston: Academic Press.
- 625 Kruschke, J. K., & Liddell, T. M. (2018). The Bayesian New Statistics: Hypothesis testing,  
626 estimation, meta-analysis, and power analysis from a Bayesian perspective. *Psychonomic*  
627 *Bulletin & Review, 25*, 178–206.
- 628 Lappin, J. S., & Bell, H. H. (1976). The detection of coherence in moving random-dot patterns.  
629 *Vision Research, 16*, 161–168.

Revised manuscript

- 630 Limousin, P., Greene, J., Pollak, P., Rothwell, J., Benabid, A.-L., & Frackowiak, R. (1997).  
631 Changes in cerebral activity pattern due to subthalamic nucleus or internal pallidum  
632 stimulation in Parkinson's disease. *Annals of Neurology*, *42*, 283–291.
- 633 Lindley, D. V. (1965). *Introduction to probability and statistics from a Bayesian point of view*,  
634 *Part 2, Inference*.
- 635 Mascord, D. J., & Heath, R. A. (1992). Behavioral and physiological indices of fatigue in a visual  
636 tracking task. *Journal of Safety Research*, *23*, 19–25.
- 637 Mulder, M. J., Keuken, M. C., Maanen, L., Boekel, W., Forstmann, B. U., & Wagenmakers, E.-J.  
638 (2013). The speed and accuracy of perceptual decisions in a random-tone pitch task.  
639 *Attention, Perception, & Psychophysics*, *75*, 1048–1058.
- 640 O'Connell, R. G., Dockree, P. M., & Kelly, S. P. (2012). A supramodal accumulation-to-bound  
641 signal that determines perceptual decisions in humans. *Nature Neuroscience*, *15*, 1729–  
642 1735.
- 643 O'Hora, D., Dale, R., Piiroinen, P. T., & Connolly, F. (2013). Local dynamics in decision making:  
644 The evolution of preference within and across decisions. *Scientific Reports*, *3*.
- 645 Oliver, M. L., Northey, G. W., Murphy, T. A., MacLean, A., & Sexsmith, J. R. (2011). Joystick  
646 stiffness, movement speed and direction effects on upper limb muscular loading.  
647 *Occupational Ergonomics*, *10*, 175–187.
- 648 Peirce, J. W. (2008). Generating stimuli for neuroscience using PsychoPy. *Frontiers in*  
649 *Neuroinformatics*, *2*.
- 650 Pilly, P. K., & Seitz, A. R. (2009). What a difference a parameter makes: A psychophysical  
651 comparison of random dot motion algorithms. *Vision Research*, *49*, 1599–1612.

Revised manuscript

- 652 Pratt, J. W., & Gibbons, J. D. (1981). Kolmogorov-Smirnov Two-Sample Tests. In J. W. Pratt &  
653 J. D. Gibbons, *Concepts of Nonparametric Theory* (pp. 318–344). New York, NY: Springer  
654 New York.
- 655 Rae, B., Heathcote, A., Donkin, C., Averell, L., & Brown, S. (2014). The hare and the tortoise:  
656 Emphasizing speed can change the evidence used to make decisions. *Journal of*  
657 *Experimental Psychology: Learning, Memory, and Cognition*, *40*, 1226–1243.
- 658 Ramachandran, V. S., & Anstis, S. M. (1983). Displacement thresholds for coherent apparent  
659 motion in random dot-patterns. *Vision Research*, *23*, 1719–1724.
- 660 Ratcliff, R., & Childers, R. (2015). Individual differences and fitting methods for the two-choice  
661 diffusion model of decision making. *Decision*, *2*, 237–279.
- 662 Ratcliff, R., & McKoon, G. (2008). The diffusion decision model: theory and data for two-choice  
663 decision tasks. *Neural Computation*, *20*, 873–922.
- 664 Ratcliff, R., & Rouder, J. N. (1998). Modeling Response Times for Two-Choice Decisions.  
665 *Psychological Science*, *9*, 347–356.
- 666 Ratcliff, R., & Smith, P. L. (2004). A Comparison of Sequential Sampling Models for Two-Choice  
667 Reaction Time. *Psychological Review*, *111*, 333–367.
- 668 Ratcliff, R., Smith, P. L., Brown, S. D., & McKoon, G. (2016). Diffusion Decision Model: Current  
669 Issues and History. *Trends in Cognitive Sciences*, *0*.
- 670 Ratcliff, R., & Tuerlinckx, F. (2002). Estimating parameters of the diffusion model: Approaches  
671 to dealing with contaminant reaction times and parameter variability. *Psychonomic*  
672 *Bulletin & Review*, *9*, 438–481.
- 673 Resulaj, A., Kiani, R., Wolpert, D. M., & Shadlen, M. N. (2009). Changes of mind in decision-  
674 making. *Nature*, *461*, 263–266.

Revised manuscript

- 675 Roitman, J. D., & Shadlen, M. N. (2002). Response of Neurons in the Lateral Intraparietal Area  
676 during a Combined Visual Discrimination Reaction Time Task. *The Journal of*  
677 *Neuroscience*, 22, 9475–9489.
- 678 Schouten, J. F., & Bekker, J. A. M. (1967). Reaction time and accuracy. *Acta Psychologica*, 27,  
679 143–153.
- 680 Selen, L. P. J., Shadlen, M. N., & Wolpert, D. M. (2012). Deliberation in the Motor System: Reflex  
681 Gains Track Evolving Evidence Leading to a Decision. *Journal of Neuroscience*, 32, 2276–  
682 2286.
- 683 Shadlen, M. N., & Newsome, W. T. (2001). Neural Basis of a Perceptual Decision in the Parietal  
684 Cortex (Area LIP) of the Rhesus Monkey. *Journal of Neurophysiology*, 86, 1916–1936.
- 685 Smith, P. L., & Ratcliff, R. (2004). Psychology and neurobiology of simple decisions. *Trends in*  
686 *Neurosciences*, 27, 161–168.
- 687 Song, J.-H., & Nakayama, K. (2009). Hidden cognitive states revealed in choice reaching tasks.  
688 *Trends in Cognitive Sciences*, 13, 360–366.
- 689 Souman, J. L., Freeman, T. C. A., Eikmeier, V., & Ernst, M. O. (2010). Humans do not have direct  
690 access to retinal flow during walking. *Journal of Vision*, 10, 14–14.
- 691 Spivey, M. J., Grosjean, M., & Knoblich, G. (2005). Continuous attraction toward phonological  
692 competitors. *Proceedings of the National Academy of Sciences of the United States of*  
693 *America*, 102, 10393–10398.
- 694 Starns, J. J., & Ratcliff, R. (2014). Validating the unequal-variance assumption in recognition  
695 memory using response time distributions instead of ROC functions: A diffusion model  
696 analysis. *Journal of Memory and Language*, 70, 36–52.



Revised manuscript

- 697 Stillman, P. E., Medvedev, D., & Ferguson, M. J. (2017). Resisting Temptation: Tracking How  
698 Self-Control Conflicts Are Successfully Resolved in Real Time. *Psychological Science*,  
699 28, 1240–1258.
- 700 Strafella, A. P., Dagher, A., & Sadikot, A. F. (2003). Cerebral blood flow changes induced by  
701 subthalamic stimulation in Parkinson's disease. *Neurology*, 60, 1039–1042.
- 702 Usher, M., & McClelland, J. L. (2001). The time course of perceptual choice: The leaky,  
703 competing accumulator model. *Psychological Review*, 108, 550–592.
- 704 Vandekerckhove, J., Tuerlinckx, F., & Lee, M. D. (2011). Hierarchical diffusion models for two-  
705 choice response times. *Psychological Methods*, 16, 44–62.
- 706 Wagenmakers, E.-J. (2009). Methodological and empirical developments for the Ratcliff diffusion  
707 model of response times and accuracy. *European Journal of Cognitive Psychology*, 21,  
708 641–671.
- 709 Wagenmakers, E.-J., Lee, M., Lodewyckx, T., & Iverson, G. J. (2008). Bayesian versus frequentist  
710 inference. In *Bayesian evaluation of informative hypotheses* (pp. 181–207). Springer.
- 711 Watamaniuk, S. N. J., Sekuler, R., & Williams, D. W. (1989). Direction perception in complex  
712 dynamic displays: The integration of direction information. *Vision Research*, 29, 47–59.
- 713 Wessel, K., Verleger, R., Nazarenus, D., Vieregge, P., & Kömpf, D. (1994). Movement-related  
714 cortical potentials preceding sequential and goal-directed finger and arm movements in  
715 patients with cerebellar atrophy. *Electroencephalography and Clinical  
716 Neurophysiology/Evoked Potentials Section*, 92, 331–341.
- 717 Wickelgren, W. A. (1977). Speed-accuracy tradeoff and information processing dynamics. *Acta  
718 Psychologica*, 41, 67–85.

Revised manuscript

- 719 Wiecki, T. V., Sofer, I., & Frank, M. J. (2013). HDDM: Hierarchical Bayesian estimation of the  
720 Drift-Diffusion Model in Python. *Frontiers in Neuroinformatics*, 7.
- 721 Wong, K.-F., & Wang, X.-J. (2006). A Recurrent Network Mechanism of Time Integration in  
722 Perceptual Decisions. *The Journal of Neuroscience*, 26, 1314–1328.
- 723 Zhang, J. (2012). The effects of evidence bounds on decision-making: theoretical and empirical  
724 developments. *Cognitive Science*, 3, 263.
- 725 Zhang, J., & Bogacz, R. (2009). Optimal Decision Making on the Basis of Evidence Represented  
726 in Spike Trains. *Neural Computation*, 22, 1113–1148.
- 727 Zhang, J., Hughes, L. E., & Rowe, J. B. (2012). Selection and inhibition mechanisms for human  
728 voluntary action decisions. *NeuroImage*, 63, 392–402.
- 729 Zhang, J., Rittman, T., Nombela, C., Fois, A., Coyle-Gilchrist, I., Barker, R. A., ... Rowe, J. B.  
730 (2016). Different decision deficits impair response inhibition in progressive supranuclear  
731 palsy and Parkinson's disease. *Brain*, 139, 161–173.
- 732 Zhang, J., & Rowe, J. B. (2014). Dissociable mechanisms of speed-accuracy tradeoff during visual  
733 perceptual learning are revealed by a hierarchical drift-diffusion model. *Frontiers in*  
734 *Neuroscience*, 8.
- 735

Revised manuscript

736 **Table 1.** Posterior estimates of the hierarchical drift-diffusion model parameters (decision  
 737 threshold  $a$ , mean drift rate  $\nu$ , non-decision time  $T_{er}$ , trial-by-trial drift rate variability  $s_\nu$ , trial-by  
 738 trial non-decision time variability  $s_t$ ). The first two data columns showed the posterior means and  
 739 standard deviations of the parameters in the joystick and keyboard sessions. 95% HDI denoted the  
 740 95% highest density intervals for the parameter difference between the joystick and keyboard  
 741 sessions.  $P_{PID}$  denoted the Bayesian  $P$ -value for the parameter difference being equal between  
 742 response modalities.

|                            |           | <b>Joystick</b>   | <b>Keyboard</b>   | <b>95% HDI</b>    | <b><math>P_{PID}</math></b> |       |
|----------------------------|-----------|-------------------|-------------------|-------------------|-----------------------------|-------|
|                            |           | (mean $\pm$ sd)   | (mean $\pm$ sd)   |                   |                             |       |
| <b><math>a</math></b>      |           | 1.508 $\pm$ 0.072 | 1.572 $\pm$ 0.073 | [-0.270, 0.120]   | 0.872                       |       |
| <b><math>\nu</math></b>    | Easy      | Up                | 1.694 $\pm$ 0.263 | 1.269 $\pm$ 0.260 | [-0.300, 1.144]             | 0.720 |
|                            |           | Down              | 1.765 $\pm$ 0.264 | 1.454 $\pm$ 0.261 | [-0.460, 0.999]             | 0.810 |
|                            |           | Left              | 2.169 $\pm$ 0.267 | 1.906 $\pm$ 0.260 | [-0.450, 1.020]             | 0.789 |
|                            |           | Right             | 2.351 $\pm$ 0.267 | 2.187 $\pm$ 0.262 | [-0.580, 0.880]             | 0.863 |
| <b><math>\nu</math></b>    | Difficult | Up                | 0.477 $\pm$ 0.257 | 0.291 $\pm$ 0.263 | [-0.526, 0.896]             | 0.866 |
|                            |           | Down              | 0.144 $\pm$ 0.262 | 0.202 $\pm$ 0.256 | [-0.822, 0.603]             | 0.932 |
|                            |           | Left              | 0.441 $\pm$ 0.261 | 0.216 $\pm$ 0.257 | [-0.529, 0.909]             | 0.854 |
|                            |           | Right             | 0.533 $\pm$ 0.263 | 0.597 $\pm$ 0.261 | [-0.769, 0.685]             | 0.964 |
| <b><math>T_{er}</math></b> |           | 0.613 $\pm$ 0.028 | 0.556 $\pm$ 0.028 | [-0.025, 0.130]   | 0.658                       |       |
| <b><math>s_\nu</math></b>  |           | 0.992 $\pm$ 0.047 | 0.916 $\pm$ 0.042 | [-0.039, 0.203]   | 0.669                       |       |
| <b><math>s_t</math></b>    |           | 0.268 $\pm$ 0.007 | 0.283 $\pm$ 0.007 | [-0.035, 0.004]   | 0.641                       |       |

743

Revised manuscript

744 **Figure 1.**

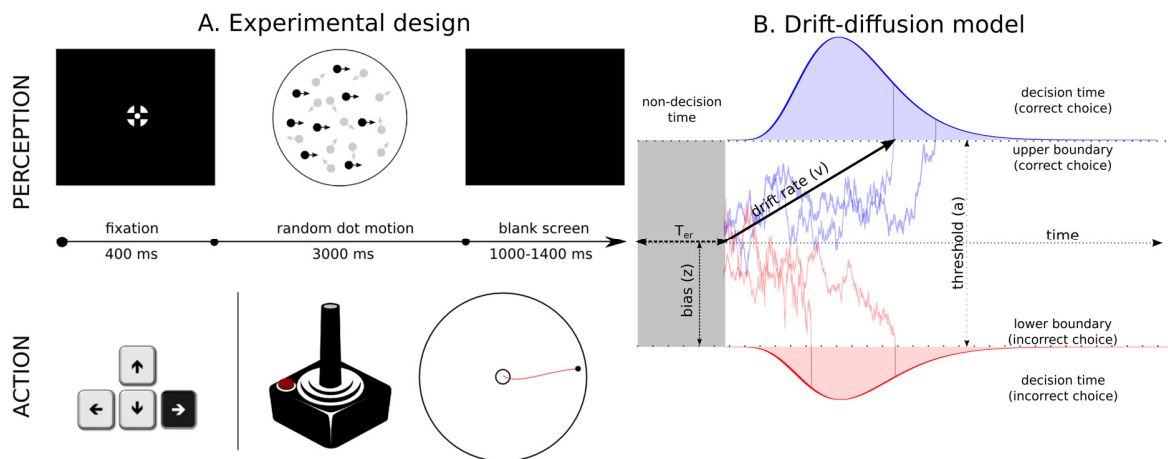

745

746 **Figure 1.** Behavioural paradigm and the drift-diffusion model (DDM). (A) The structure of a  
 747 single trial of the experiment. A fixation screen was presented for 400 ms, after which the random-  
 748 dot kinematogram was presented for a maximum of 3000 ms or until response. The inter-trial  
 749 interval was randomised between 1000 and 1400 ms. Participants were instructed to indicate the  
 750 direction of the coherent motion direction ( $0^\circ$ ,  $90^\circ$ ,  $180^\circ$  or  $270^\circ$ ) using joystick or keyboard in  
 751 two counterbalanced sessions. (B) The drift-diffusion model and examples of evidence  
 752 accumulation trajectories. The parameter ( $a$ ) indicates the distance between the correct and  
 753 incorrect decision thresholds. The drift rate ( $v$ ) represents the speed of evidence accumulation and  
 754 its magnitude is determined by the quality of the evidence. A positive  $v$  indicates that, on average,  
 755 the accumulation of sensory evidence is towards the correct decision threshold. The starting point  
 756 ( $z$ ) represents the response bias towards one of the two thresholds. The non-decision time ( $T_{er}$ )  
 757 represents the latencies of non-decision processes, which is illustrated besides the decision time  
 758 distribution in the figure. The diffusion process starts at the starting point ( $z$ ) until the accumulated  
 759 evidence reaches one of the two thresholds. If the accumulated evidence reaches the correct (upper)

Revised manuscript

760 threshold (blue trajectories), the model predicts a correct response. Because of noise, the  
761 accumulated evidence may reach the incorrect (lower) threshold (red trajectories) and the model  
762 predicts an incorrect response. The predicted single-trial RT is the sum of the duration of the  
763 evidence accumulation (decision time) and the non-decision time  $T_{er}$ .

764

Revised manuscript

765 **Figure 2.**

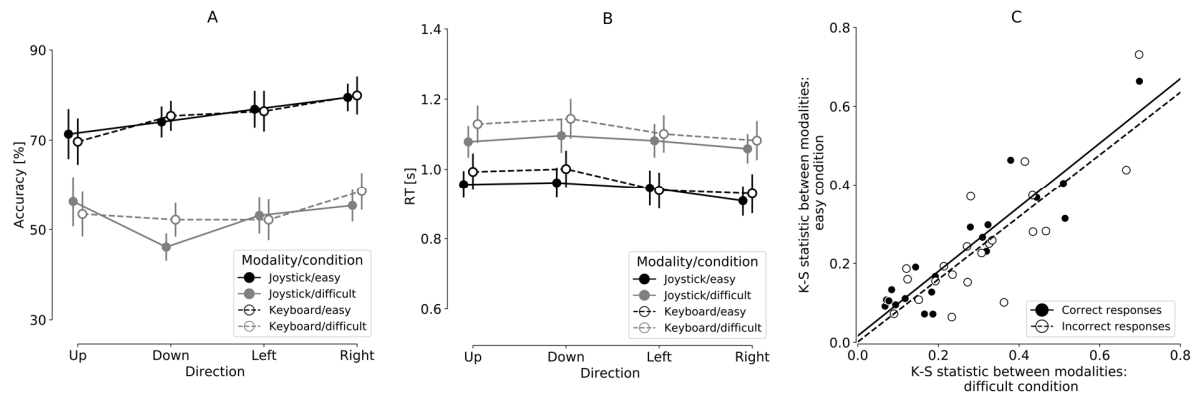

766

767 **Figure 2.** Behavioural results in joystick and keyboard sessions. (A) Average decision accuracy  
768 (proportion of correct) across participants. Error bars denote standard errors of the means. (B)  
769 Average mean RT across participants. Error bars denote standard errors of the means. (C) The  
770 Kolmogorov-Smirnov (K-S) statistics when comparing the RT distributions between response  
771 modalities. The scatter plot showed the K-S statistics in the difficult condition as a function of the  
772 that in the easy condition. Each data point represents the correct (filled data point) or incorrect  
773 (open data point) trials of one participant. Linear regression lines were illustrated for correct (solid  
774 line) and incorrect (dashed line) trials.

775

Revised manuscript

776 **Figure 3.**

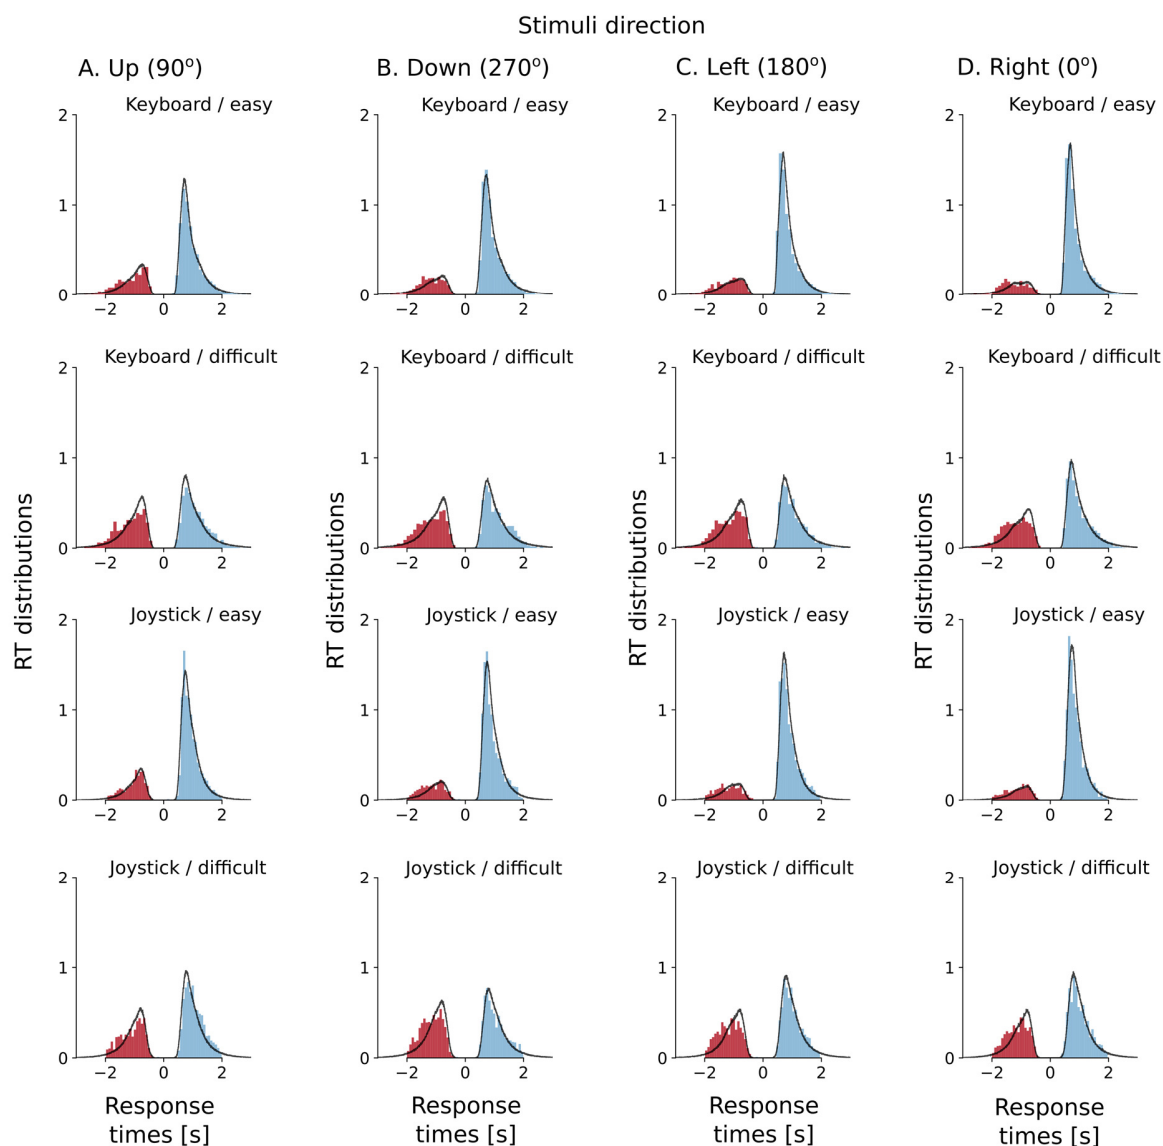

777

778 **Figure 3.** Posterior predictive RT distributions from the fitted DDM. Each panel shows the  
779 normalized histograms of the observed data (blue bars – correct responses, red bars – incorrect  
780 responses) and the model prediction (black lines) across participants. The RT distribution along  
781 the positive x-axis is from correct responses, and the areas under the curve on the positive x-axis  
782 corresponds to the observed and predicted accuracy. The RT distribution along the negative x-axis

Revised manuscript

783 is from error responses, and the areas under the curve on the negative x-axis corresponds to the  
784 observed and predicted error. The posterior predictions of the model were generated by averaging  
785 500 simulations of the same amount of model predicted data as observed in the experiment using  
786 posterior parameter estimates.

787



Revised manuscript

788 **Figure 4.**

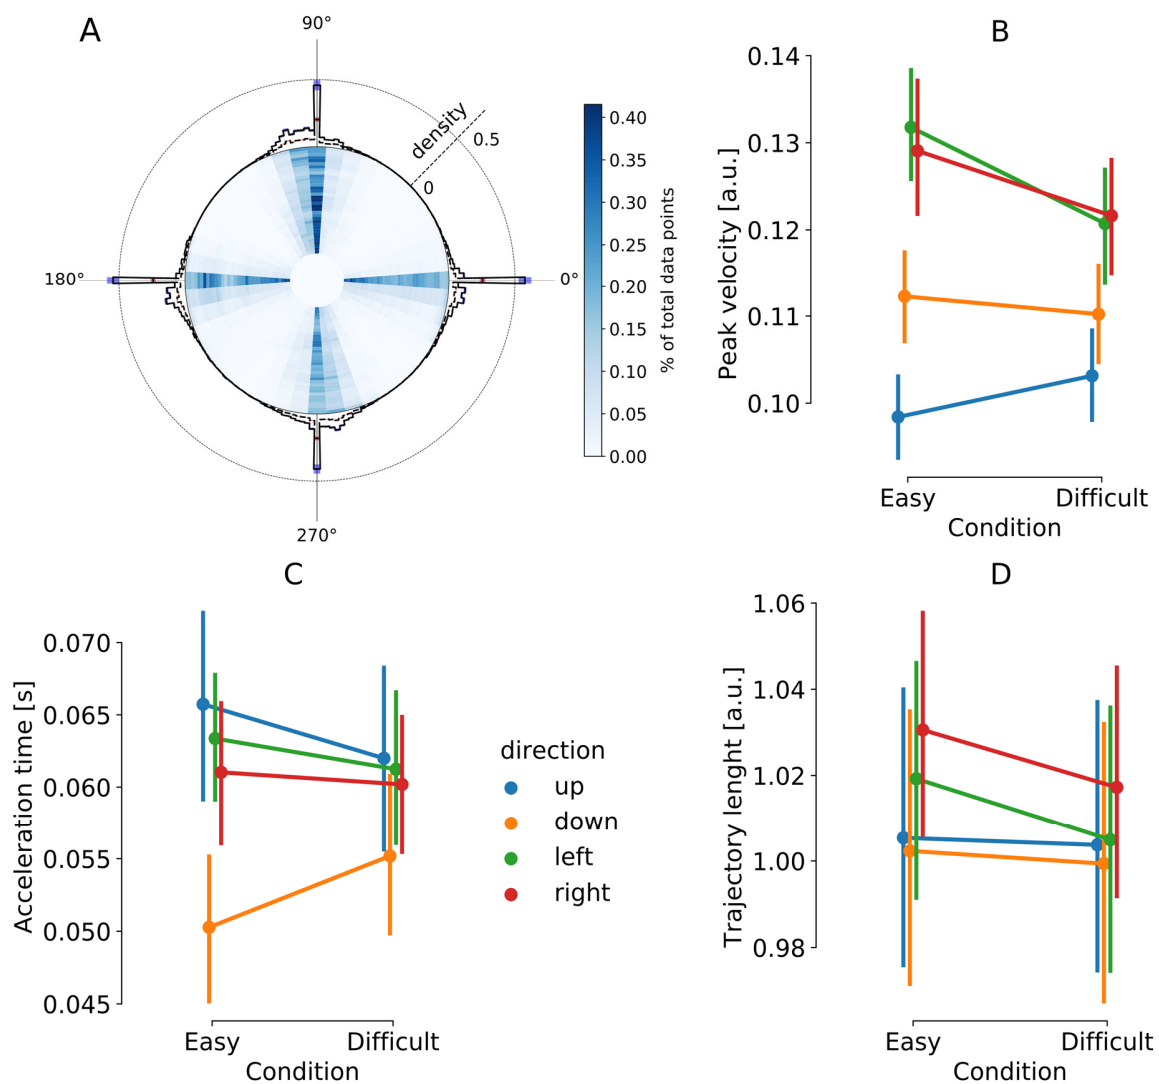

789

790 **Figure 4.** Measures from joystick trajectories. (A) The summary of movement trajectories and  
791 final positions. The heat map in the centre represents the proportion of the total joystick position  
792 across trials and participants. The histogram on the edge represents the distribution of final  
793 positions. (B) The peak velocity of joystick movements averaged across participants. (C) The mean  
794 acceleration time of joystick movements averaged across participants (D) The mean trajectory  
795 length averaged across participants. The error bars denote the standard errors of the means.

Revised manuscript

796 **Supplementary Figure 1.**

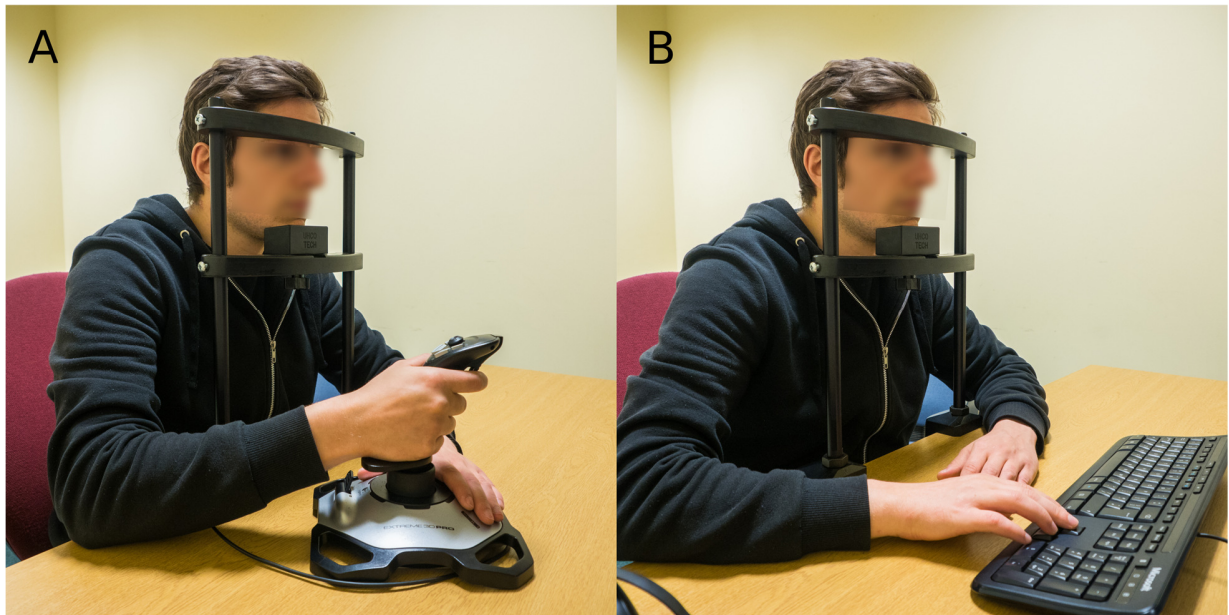

797

798 **Supplementary Figure 1.** *The experimental setup and joystick positioning. Participant was*  
799 *seated in front of the screen. The distance from the screen and the head position was maintained*  
800 *using a chinrest. Seating height was adjusted to the most comfortable position. Joystick was*  
801 *positioned to the right of the participant (A). Exact position of the device was adjusted to the most*  
802 *comfortable position. Participants were asked to hold the base of the joystick while responding.*  
803 *Keyboard was placed parallel to the screen to ensure the arrow directions correspond to the*  
804 *direction of the motion of the visual stimuli (B).*
